## 12 Abstract

13

## 14 Introduction

15 Self-help groups (SHGs) have been effective in improving the health and wellbeing of women generally  
16 but there is little evidence on whether and how they improve HIV and sexual and reproductive health  
17 (SRH) outcomes among female sex workers (FSWs), particularly in sub-Saharan Africa. This scoping  
18 review seeks to address this gap by identifying and analysing literature on SHG for FSWs in sub-  
19 Saharan Africa.

20

## 21 Materials and methods

22 This scoping review (1) identified relevant studies; (2) selected the studies; (3) charted the data; and  
23 (4) collated, summarised, and reported the results. A search strategy was developed; CINAHL, Medline  
24 and Global Health databases were searched.

25

## 26 Results

27 Eleven studies were identified, two were quantitative, seven were qualitative and two were mixed  
28 methods. Studies were from seven countries in sub-Saharan Africa. The studies suggested that SHGs  
29 can improve SRH outcomes and reduce HIV vulnerabilities among FSWs by providing emotional and  
30 financial support, health education, linkage to care, and social capital (i.e., benefits derived from  
31 associations). The studies also highlighted the need for tailored interventions that address the unique  
32 needs and challenges faced by FSWs.

33

## 34 Conclusions

35 The findings of this scoping review underscore the importance of building social cohesion by  
36 incorporating SHGs into a range of HIV prevention strategies in sub-Saharan Africa. SHGs have the  
37 potential to improve SRH and HIV outcomes among FSWs. Further research is needed to explore the  
38 effectiveness of SHGs in different contexts and to identify best practices for implementing and  
39 sustaining SHGs for FSWs.

40

## 41 Introduction

42 Globally, female sex workers (FSWs) are 30 times more likely to acquire HIV than general population  
43 women [1]. High numbers of sexual partners, inability to control prevention measures [2], stigma that  
44 fuels violence and, criminalisation of sex work, combine to reduce FSWs' exposure to services and  
45 support, which in turn, increases their vulnerabilities to HIV and other sexually transmitted infections  
46 (STIs) [3]. A systematic review of community empowerment and involvement of FSWs in targeted  
47 sexual and reproductive health (SRH) interventions in Africa found that FSWs aged 15 to 49 years were  
48 at a higher risk of SRH morbidity, violence and discrimination compared to same age general  
49 population women [4]. However, the overall impact of empowerment interventions on FSWs was not  
50 clearly established in this review.

51  
52 In sub-Saharan Africa (SSA), the epicentre of the HIV epidemic [5] the burden of HIV and other STIs  
53 among FSWs is disproportionately high [6]. For example, in Zimbabwe, HIV prevalence was estimated  
54 to be 48% among FSWs in 2022 compared to 11% among the general population of adult women [7].  
55 It is important to note that sex work has been a contributing factor in the spread of HIV in SSA [8].

56  
57 FSWs' vulnerabilities complicate their ability to prevent or manage HIV; therefore, interventions that  
58 address these vulnerabilities are needed. Self-help groups (SHGs), where individuals with  
59 commonalities come together to support each other, have potential for impact [9]. The concept of the  
60 SHG as a catalyst for change came about in 1935 when these groups were used to help alcoholics  
61 recover [10]. The approach became widely accepted for non-alcohol addiction problems after World  
62 War II [11]. In the 1960s, civil rights movements began to evolve in many developed countries, as  
63 people became aware of their collective power. This concept emphasised high levels of group  
64 ownership, control and management concerning goals, processes and outcomes [4]. According to  
65 Brody et al [12], collective or individual empowerment can happen when individuals join together to  
66 address their challenges.

67

68 SHGs may facilitate empowerment and foster autonomy in individuals or groups. Among the theories  
69 that explain how SHGs influence empowerment is the integrated empowerment framework for FSWs,  
70 which combines various elements and strategies aimed at empowering individuals or communities  
71 [13]. It integrates multiple aspects of empowerment and shows how they might achieve meaningful  
72 and sustainable outcomes [13].

73

74 Past research has shown that SHGs, along with other community mobilisation and structural  
75 interventions, can empower FSWs to address their specific vulnerabilities [14]. A study in India  
76 highlighted the impact of SHGs among sex workers, when FSWs who attended SHGs demonstrated  
77 higher HIV knowledge, accessed services more frequently, and were more likely to turn away clients  
78 who refused to use condoms, compared to those that did not attend SHGs [15]. However, there is a  
79 lack of substantive evidence on how SHGs can address health-related outcomes of FSW in the SSA  
80 context. This scoping review sought to explore whether and how SHGs improve FSWs' SRH and HIV  
81 outcomes in SSA.

82

## 83 **Methods**

84 The main objective of the scoping review was to explore a body of literature to identify what is known  
85 about SHGs in relation to addressing FSWs' SRH and HIV outcomes in SSA. A preliminary search of  
86 MEDLINE, the Cochrane Database of Systematic Reviews and *JB* Evidence Synthesis was conducted  
87 and no current or planned systematic or scoping reviews focusing on FSWs on the topic were  
88 identified. The scoping review started with the development of a study protocol. The study protocol  
89 was uploaded on Open Science Framework (OSF) and subsequently published [16].

90

## 91 Identifying the research question

### 92 **Review question**

93 *The scoping review sought to answer the following questions:*

- 94 1. Do self-help groups improve SRH and HIV outcomes such as family planning and condom use,  
95 HIV/STI knowledge and prevention, HIV testing, treatment, and adherence, sexual self-  
96 efficacy, gender-based violence education, SRH knowledge/education, among female sex  
97 workers in SSA?
  - 98 a. If so, what are the mechanisms through which SHGs improve these outcomes?
  - 99 b. How feasible and acceptable are SHGs among FSWs?
  - 100 c. What gaps exist in the evaluation of SHGs and SRH and HIV outcomes among FSWs in  
101 SSA?

102

## 103 Eligibility criteria

104 The Population–Concept–Context (PCC) framework [17] was used to develop the research objective(s)  
105 and question(s) to inform inclusion and exclusion criteria and consequently, the literature search  
106 strategy.

107

### 108 **Population**

109 Female sex workers in SSA were included. The review considered FSWs as women who received  
110 money and/or goods or favours in exchange for sex. Transactional sex relationships were also  
111 considered as sex work, even if participants did not self-identify as sex workers. The review was  
112 restricted to studies conducted within SSA between 1 January 2000 and 30 September 2024. This  
113 period was chosen because it allowed the search to include relevant articles within the SSA context  
114 considering SHGs are relatively new within this setting compared to others such as South Asia where

115 they have a longer and institutionalised history [18]. This period also considered that there was no  
116 similar scoping review during that time.

117

## 118 Concept

119 The scoping review explored the concepts of SHGs and FSWs' SRH and HIV outcomes.

120

## 121 Context

122 Research studies conducted in sub-Saharan Africa.

123

## 124 Types of Sources

125 The scoping review considered studies that met the inclusion criteria. Extracted quantitative data  
126 included characteristics of the study population, the proportion of the study population that consisted  
127 of FSWs, sample size, year of data collection, study location, sampling strategy and participants' age  
128 range. The review also considered qualitative studies that reported on grounded theory,  
129 ethnography, case studies and qualitative descriptions.

130

## 131 Study design

132 The framework developed by Arksey and O'Malley [19], which Levac et al. [20] and Colquhoun et  
133 al.[21] expanded on, and Peters [22] further outlined in the Joanna Briggs Institute Manual (2020  
134 version) was employed. The stages of the review included: 1) identifying the research question, 2)  
135 identifying relevant studies, 3) selecting studies, 4) charting the data, and 5) collating, summarising,  
136 and reporting the results [19].

137

## 138 Stage 1: Identifying the research question

139 The Population–Concept–Context (PCC) framework [17] was used to identify the main concepts in the  
140 primary review question and to inform the search strategy. The primary review question was, 'Do self-  
141 help groups improve sexual and reproductive health and HIV outcomes among female sex workers in  
142 sub-Saharan Africa?'. A sub-question to this was 'If so, what are the mechanisms through which SHGs

143 improve these outcomes?’ and another sub-question was ‘How feasible and acceptable are SHGs  
144 among FSWs?’. Yet another sub-question was ‘What gaps exist in the evaluation of SHGs and SRH and  
145 HIV vulnerabilities among FSWs in SSA?’. These questions enabled us to map the range of relevant  
146 literature around these aspects and inform the direction of future research.

147

## 148 Stage 2: Identifying relevant studies

### 149 *Search strategy and information sources*

150 Identification of studies relevant to this review was achieved by searching electronic databases of the  
151 published literature including Medline, Global Health and CINAHL databases. The general search  
152 strategy is outlined in Table 1:

153

154 **Table 1: Search Strategy**

| Concept                        | Search terms                                                                                                                                                                                                                                                                                                                                                                                                                                                                                                                                                                                                                                                                                                                                                                              |
|--------------------------------|-------------------------------------------------------------------------------------------------------------------------------------------------------------------------------------------------------------------------------------------------------------------------------------------------------------------------------------------------------------------------------------------------------------------------------------------------------------------------------------------------------------------------------------------------------------------------------------------------------------------------------------------------------------------------------------------------------------------------------------------------------------------------------------------|
| Empowerment groups             | “Self help group*” OR “self-help group*” OR SHG* OR “collective*” OR “empowerment group*” OR “community group*” OR “group based activit*” OR “savings group*” OR “support group*” OR “mukando” OR “psycho social support group*” OR “peer support group*” OR “support system*” OR “safety net*” OR “morale booster”                                                                                                                                                                                                                                                                                                                                                                                                                                                                       |
| Sexual and reproductive health | “Sexual and reproductive health” OR “SRH” OR “reproductive health” OR “health outcome*” OR “sexual health” OR “health access” OR “access to health” OR “clinic uptake” OR “unintended pregnanc*” OR “STI*” OR “gender based violence*” OR “GBV” OR “human papilloma virus” OR “HPV” OR “safe sex” OR “family planning” OR “cervical cancer” OR “safe abortion”                                                                                                                                                                                                                                                                                                                                                                                                                            |
| HIV                            | “HIV” OR “hiv-1*” OR “hiv-2*” OR “hiv1” OR “hiv2” OR “HIV infect*” OR “human immunodeficiency virus” OR “human immuno-deficiency virus” OR “human immune-deficiency virus” OR “acquired immunodeficiency syndrome” OR “acquired immuno-deficiency syndrome” OR “HIV Infection”                                                                                                                                                                                                                                                                                                                                                                                                                                                                                                            |
| Female sex worker              | “Female sex worker*” OR “FSW” OR “sex worker*” OR “prostitute*” OR “thigh vendor*” OR “transactional sex*” OR “bar maid*” OR “sex work*” OR “girls selling sex” OR “women selling sex” OR “female* selling sex” OR “young women selling sex” OR “transact* sex” OR “exchang* sex” OR “sell* sex” OR “sold sex” OR “trad* sex” OR “commercial sex” OR “escort” OR “hooker*” OR “streetwalker*” OR “whore” OR “hustler*” OR “woman of the street*” OR “bawd” OR “call girl*” OR “courtesan” OR “drab*” OR “tart*” OR “harlot*” OR “slut”                                                                                                                                                                                                                                                    |
| Sub-Saharan Africa             | “Africa, south of the Sahara” OR “sub-Saharan Africa” OR “Angola” OR “Benin” OR “Botswana” OR “Burkina Faso” OR “Burundi” OR “Cameroon” OR “Cape Verde” OR “Central African Republic” OR “CHAD” OR “Comoros” OR “Congo” OR “Congo Democratic Republic” OR “Djibouti” OR “Equatorial Guinea” OR “Eritrea” OR “Ethiopia” OR “Gabon” OR “Gambia” OR “Ghana” OR “Guinea” OR “Guinea-Bissau” OR “Cote d'Ivoire” OR “Ivory Coast” OR “Kenya” OR “Lesotho” OR “Liberia” OR “Madagascar” OR “Malawi” OR “Mali” OR “Mozambique” OR “Namibia” OR “Niger” OR “Nigeria” OR “Sao tome and Principe” OR “Rwanda” OR “Senegal” OR “Seychelles” OR “Sierra Leone” OR “Somalia” OR “South Africa” OR “South Sudan” OR “Sudan” OR “Swaziland” OR “Tanzania” OR “Togo” OR “Uganda” OR “Zambia” OR “Zimbabwe” |

155

156 On 20<sup>th</sup> April 2024, the lead author (GM) tested a general search strategy by running it using a Boolean  
157 search on the Discover platform, combining the search terms from the PCC (Population, Concept  
158 Context) framework using “AND” and separating different terms using “OR”. She then searched each  
159 of three databases (Medline, Global Health and CINAHL) using the key terms from the PCC framework  
160 to find the Medical Subject Headings (MeSH) used in the databases. She then combined the MeSH  
161 terms with the free text in the search strategy that she developed (see S1 Table). These databases  
162 were carefully selected for their comprehensiveness in covering the area under research. The  
163 researchers’ familiarity with the databases also enhanced efficiency in the search process. Search  
164 terms were determined with input from the research team, research collaborators and knowledge  
165 users. Searches were limited to literature published in English only and literature published before  
166 2000 was excluded so that the review considered the most recent publications. Search results were  
167 downloaded and imported into Endnote 20. After removing duplicates in Endnote 20, the articles were  
168 exported to Covidence, a collaborative software. The search was closed on 30<sup>th</sup> September 2024.

169

## 170 [Study selection](#)

171 Once the articles were imported into Covidence, duplicates were removed again. The review process  
172 then started. It consisted of two levels of screening: (1) a title and abstract review and (2) full-text  
173 review. GM and a co-reviewer (ON) did the first and second level of screening. The inclusion and  
174 exclusion criteria specified the following:

- 175 1. Articles must be published between 1<sup>st</sup> January 2000 and 30<sup>th</sup> September 2024.
- 176 2. Articles must be in English.
- 177 3. Articles must report findings from primary research.
- 178 4. Articles must fit within the PCC framework.

179 Any articles that did not fit these criteria were excluded. The articles that had a title and abstract that  
180 seemed to be eligible were included in this first level of screening. These articles reported on FSWs  
181 and had some aspects of participation in SHG within the SSA context.



182

183 The second stage of the review involved GM and ON reading through all the articles that were included  
184 for the full-text review. To determine inter-rater agreement for articles to include in full text review,  
185 Covidence software was used. Any discordant full-text articles were reviewed a second time and  
186 further disagreements about study eligibility at the full-text review stage were resolved through  
187 discussion with a more senior researcher (WM) until full consensus was obtained.

188

## 189 Results

### 190 Study descriptions

191 The search yielded 1,567 potentially relevant records from the three databases; 92 records were  
192 identified by Covidence to be duplicates and 1,474 records remained for title and abstract screening.  
193 Title and abstract screening were done by two reviewers and there were 36 conflicts from the records  
194 (i.e., reviewers disagreed). The conflicts were mainly on articles that were not SHG-related but seemed  
195 to look at issues to do with empowerment. The review team resolved conflicts by going through the  
196 titles and abstracts together. There remained 35 articles for full text screening. After cross-validation  
197 and full text screening, 11 articles were selected. Studies that were: not from SSA, did not focus on  
198 FSWs, were not within the study period and, did not employ primary research methodologies were  
199 excluded. Figure 1 below presents a summary of the selection process.

200

201 **<Insert Figure 1 here>**

202 *Figure 1: PRISMA flowchart of study selection process*

### 203 Study characteristics

204 The 11 studies included for final review were conducted in seven countries in SSA. One study was  
205 multi-country and conducted in three countries: Kenya, Tanzania, and Uganda [23]. Four of the studies

206 were conducted in Tanzania and were of the same intervention and trial (Project Shikamana, 4.1 to  
207 4.3) [24-27]. One study was conducted in Zimbabwe [28], another was from Cameroon [29], one from  
208 Côte d'Ivoire [30], one from South Africa [31] and two from Kenya [32, 33] (Table 2).

209  
210 While the review primarily focused on FSWs, two of the articles were diverse and FSWs were studied  
211 within the context of other populations such as fishermen, HIV care providers, police, venue  
212 managers, community advisory board members and research staff [23, 34] (Table 2).

213

214 <Insert Table 2 here>

215

## 216 Quality of included studies

217 The quality of included qualitative studies was assessed using the Critical Appraisal Skills Programme  
218 (CASP) tool (Table 3) [35], which comprises ten questions. Of the nine qualitative studies included, one  
219 was a case study and could not be assessed using all the ten questions. We determined that three of  
220 the ten CASP questions were not relevant to the case study. All the included studies were deemed to  
221 be of good quality based on the answers to the ten CASP questions.

222

223 <Insert Table 3 here>

224

225 To assess the quality of the one randomised control trial (RCT) that was included, we used the  
226 Cochrane Risk of Bias 2 (RoB 2) tool [36] (Table 4). This tool assesses five aspects of bias: selection,  
227 performance, detection, and reporting. Risk categories were very low, low, moderate, and high.

228

229 Table 4: Quality appraisal for RCT (Risk of bias 2 (RoB2))

|  | Domain | Risk of bias | Risk of bias judgement |
|--|--------|--------------|------------------------|
|--|--------|--------------|------------------------|

|   |                         |                                                                                                                                                                                                                                                                                                                                                                                                                        |          |
|---|-------------------------|------------------------------------------------------------------------------------------------------------------------------------------------------------------------------------------------------------------------------------------------------------------------------------------------------------------------------------------------------------------------------------------------------------------------|----------|
| 1 | <b>Selection bias</b>   | The study used a 2-community randomised trial design, which reduces the risk of selection bias. Time-location sampling was used to enrol participants, which is a robust method for reaching hard-to-reach populations like female sex workers. The baseline characteristics of the intervention and control groups appear to be well-balanced, further reducing the risk of selection bias.                           | Very low |
| 2 | <b>Performance bias</b> | The study description indicates that the intervention involved multiple components, including a community-led drop-in centre, peer education, service navigation, and provider trainings. These intervention elements were delivered to the intervention group, while the control group did not receive these activities. This differential delivery of the intervention creates a potential risk of performance bias. | Low      |
| 3 | <b>Detection bias</b>   | The study reports that HIV testing and viral load assessments were conducted at baseline and 18-month follow-up. These outcome assessments were done using standard laboratory methods, which reduces the risk of detection bias. However, the document does not provide details on whether the outcome assessors were blinded to the participants' intervention status.                                               | Low      |
| 4 | <b>Attrition bias</b>   | The study had some loss to follow-up, with 171 HIV-positive and 216 HIV-negative participants completing both baseline and 18-month assessments. The authors used intent-to-treat analysis and inverse probability weighting to account for missing data, which helps mitigate the risk of attrition bias.                                                                                                             | Low      |
| 5 | <b>Reporting bias</b>   | The study appears to have reported on all the pre-specified primary and secondary outcomes, reducing the risk of reporting bias. The protocol or trial registration is not provided, so there is some uncertainty about potential selective reporting.                                                                                                                                                                 | Low      |
| 6 | <b>Other bias</b>       | The study was funded by the US National Institute of Mental Health, and there is no indication of other sources of funding that could introduce bias. The authors declare no conflicts of interest, further reducing the risk of other biases.                                                                                                                                                                         | Low      |
|   | <b>Overall</b>          | Overall, this was a well-designed and conducted study with a generally <b>low</b> risk of bias, though some uncertainty remains around blinding of outcome assessors and potential selective reporting.                                                                                                                                                                                                                | Low      |

230

231 One included cross-sectional study was assessed using the Risk Of Bias In Non-randomised Studies of  
 232 Interventions (ROBINS-I) assessment tool [37] (Table 5). This tool focuses on bias: due to confounding,  
 233 in study participant selection, in interventions classification, due to deviations from intended  
 234 interventions, due to missing data, in outcome measurement and in selection of the reported result.  
 235 Risk categories were low, moderate, and high.

236

237 Table 5: Critical appraisal of cross-sectional quantitative study- Risk Of Bias In Non-randomised Studies of Interventions

238 (ROBINS-I)

|   | <b>Domain</b>                                           | <b>Explanation</b>                                                                                                                                                                                                               | <b>Risk of bias judgement</b> |
|---|---------------------------------------------------------|----------------------------------------------------------------------------------------------------------------------------------------------------------------------------------------------------------------------------------|-------------------------------|
| 1 | <b>Bias due to confounding</b>                          | The study adjusted for potential confounders like age, education, and marital status in the multivariable analysis. However, there may be other important confounders, such as duration of sex work, that were not adjusted for. | Moderate                      |
| 2 | <b>Bias in selection of participants into the study</b> | Bias in selection of participants into the study was low because time location sampling was used to recruit study participants.                                                                                                  | Low                           |
| 3 | <b>Bias in classification of interventions</b>          | In this observational study, the key "intervention" was participation in community savings groups. The study states that a validated measure was used to assess this exposure.                                                   | Low                           |

|   |                                                           |                                                                                                                                                                                                                                           |          |
|---|-----------------------------------------------------------|-------------------------------------------------------------------------------------------------------------------------------------------------------------------------------------------------------------------------------------------|----------|
| 4 | <b>Bias due to deviations from intended interventions</b> | Not directly applicable.                                                                                                                                                                                                                  | -        |
| 5 | <b>Bias due to missing data</b>                           | The study used complete case analysis, indicating minimal missing data on the key variables.                                                                                                                                              | Low      |
| 6 | <b>Bias in measurement of outcomes</b>                    | The primary outcome of consistent condom use was self-reported by participants. While validated measures were used, self-reported sexual behaviours are subject to social desirability bias.                                              | Moderate |
| 7 | <b>Bias in selection of the reported result</b>           | The study appears to have reported all the pre-specified analyses without evidence of selective reporting.                                                                                                                                | Low      |
|   | <b>Overall risk of bias assessment</b>                    | Based on the ROBINS-I assessment, the overall risk of bias for this cross-sectional observational study is <b>low</b> . The main sources of potential bias are in the areas of confounding and the use of self-reported outcome measures. |          |

239

240 Overall, all the included studies were of good quality.

241

## 242 Discussion

243 Various theories have been used to explain how SHGs can influence health outcomes of women and  
 244 these span various fields. We adapted the integrated empowerment framework for FSWs which  
 245 combines various elements and strategies aimed at empowering individuals or communities. The  
 246 three main domains of this framework are power within, power with (others), and power over  
 247 (resources) [13, 38, 39]. We borrow from some components of the framework [13]. The  
 248 empowerment framework is depicted in Figure 2 below.

249

250 <Insert Figure 2 here>

251 *Figure 2: Integrated empowerment framework*

252 Source: Blanchard et al. BMC Public Health 2013, 13:234

253

### 254 Power within

255 The concept of "power within" refers to the extent of influence, control, and decision-making  
 256 authority that individuals or groups possess within their immediate social and environmental contexts

257 [40]. It relates to the degree to which an individual or group can exercise their agency and affect their  
258 own lives or the lives of others within their microsystem [40].

259

260 Being a member of a SHG empowered FSWs with knowledge of HIV prevention services. For example,  
261 in the Kenyan study, most of the participants mentioned having little or no knowledge of HIV  
262 prevention before engaging with the Sex Workers Outreach Program (SWOP) clinic services [30, 32].  
263 However, women reported that after accessing the services and information from the SWOP's 'sex  
264 worker-friendly' clinics, they no longer agreed to have sex without a condom because they understood  
265 that the nature of the relationship with their clients was purely transactional [32]. In the SWOP clinics,  
266 some participants also reported using pre-exposure prophylaxis because they were now more aware  
267 of the risks involved, and should there be a condom failure, they were protected [30]. The  
268 empowerment they gained by being part of a SHG helped FSWs recognise their self-worth and choose  
269 whom to have sex with, and reduced their reliance on men [30]. This Kenyan study suggests that other  
270 health outcomes, such as modern family planning use, may also be influenced by these interventions,  
271 especially when family planning is part of a comprehensive empowerment-based program [32].

272

273 Two studies found statistically significant associations between higher pay per sexual encounter,  
274 higher total income, higher sex work income and group participation [24, 26]. Community savings  
275 group participation was significantly associated with reported consistent condom use (CCU) with new  
276 clients and regular clients (but not with steady, non-paying partners) [26]. Higher income was  
277 associated with CCU with a new partner[26]. CCU with a regular partner was also associated with  
278 higher income and other factors such as savings group participation, older age, longer time in sex  
279 work, and having financial dependents. Overall, SHGs enhanced FSWs' agency, which aligns with the  
280 "power within" concept.

281

## 282 Power with others

283 "Power with others" denotes a collaborative and shared form of authority where individuals or groups  
284 come together in pursuit of common objectives or collectively address issues [40]. It embodies the  
285 concept that power is not concentrated within a single entity or individual; instead, it is distributed  
286 among the participants in a cooperative manner [40]. Within this framework, individuals or groups  
287 join forces, combining their collective resources, knowledge and influence so that they effect change,  
288 make decisions, or achieve tasks, usually to aid fairness, social justice, or mutual benefit[40].

289

290 Most of the FSWs reported benefiting from a support system with other sex workers, their local  
291 community, that they had devised to encourage and help each other out [28, 32]. This support  
292 included, but was not limited to, financial and emotional support, sharing of health education  
293 information and linkage to health care services [32]. Others also highlighted how they helped each  
294 other to seek medical assistance during illness and, in some cases, even accompanying each other to  
295 the clinic/hospital for treatment [27, 28, 41]. Where they faced violence from clients, they assisted  
296 each other through telephone-based security strategies where they called each other for assistance  
297 [42]. Additionally, they offered each other guidance on issues such as condom breakage, partner  
298 violence and matters related to child support and care. It is also within these SHGs that they advised  
299 each other on the dangers of drug and alcohol use. These bonds and associations within their peer  
300 groups provided solace and the means to thrive despite numerous challenges [32].

301

302 Social capital (i.e. benefits derived from association) was a resource for resilience which held great  
303 value among FSWs. Furthermore, the act of coming together allowed FSWs to address instances of  
304 abuse by security forces during their work [42]. FSWs also trained each other on how to survive in the  
305 industry and on social security. Also, they taught each other about condom use [23, 24, 27].

306

307 Creative Space workshops (CSWs) offered FSWs a platform to address common shared vulnerabilities.  
308 FSWs recognised the therapeutic value of peer-led group sessions, where they shared their personal  
309 struggles and traumas. These sessions contributed to enhancing sex workers' self-esteem by fostering  
310 a supportive, non-judgmental, rights-based discourse, which led to a reframing of sex work as  
311 legitimate employment and portrayed sex workers as individuals with inherent rights [31]. They also  
312 exposed sex workers to valuable health knowledge, broadened their understanding of their legal  
313 rights, and informed them on available support services. In this way, CSWs promoted a greater sense  
314 of emotional well-being, and was experienced as empowering, instilling a greater sense of agency in  
315 the face of pervasive structural and interpersonal challenges. It also fostered hope that their  
316 circumstances could improve. Overall, the group concept and collective empowerment illustrated the  
317 “power with others” concept.

318

### 319 **Power over resources**

320 "Power over resources" pertains to the capacity of individuals, organisations, or entities to exercise  
321 control, distribute, and make decisions regarding assets, commodities, or properties [43]. This power  
322 capacitates them to determine how these resources are used, distributed, and managed [43]. It is an  
323 essential aspect of resource management and can have significant implications for individuals and  
324 communities and how they manage SRH and vulnerability to HIV [43].

325

326 In the context of savings funds, that is, where FSWs jointly contribute some money and the  
327 disbursement of funds within SHGs, they were generally perceived as empowering [41], and  
328 empowerment has a positive influence on sexual risk behaviour. Although some SHGs gave FSWs  
329 power over resources, they fell short of establishing a framework for FSWs to secure and manage  
330 long-term savings. These savings would typically be earmarked for purposes such as transitioning from  
331 sex work, homeownership, child support, marriage, accessing essential healthcare, or returning to  
332 their places of origin [44]. However, one study clearly demonstrated the “power over resources” when

333 FSWs were able to register a catering company business [25]. They formalised their activities by  
334 registering with the government as an official business and this business grew, registering membership  
335 of 50 FSWs and became self-sustained and continued meeting even after the trial [25]. However, it  
336 was not established in this study how far this empowerment impacted on SRH and HIV outcomes.

337  
338 The benefits derived from participating in SHGs for FSWs predominantly revolve around the  
339 empowerment of the individual (power within) and the strength they gain from uniting as a group  
340 (power with others). However, in most of the articles reviewed, achieving "power over resources"  
341 remains a challenge. Empowerment strategies have been employed to increase FSWs' access to social  
342 entitlements, financial credit, and educational opportunities which opens up more choices for them  
343 in terms of decisions that impact their HIV and SRH outcomes. In India, for example, significant  
344 progress has been made with regards to achieving "power over resources" but this is something that  
345 takes time [45]. One good example is the Usha Multi-purpose Cooperative Society Limited (USHA),  
346 which is the largest and first ever sex worker-led financial institution in Southern Asia which is  
347 exclusively run by sex workers and for sex workers [45]. Since there is a need for comprehensive  
348 change, it is acknowledged that community mobilisation strategies among FSWs must be  
349 complemented by structural interventions aimed at addressing the underlying social, economic, legal,  
350 and political structures that initially contributed to their disempowerment.

351  
352 Most of the included studies were of short duration, with most lasting less than one year. This  
353 relatively short intervention period may have limited the ability to observe the long-term results that  
354 are anticipated from participation in SHGs, including improved mental and physical health, reduced  
355 risk of HIV acquisition, and decreased HIV transmission, among other SRH concerns. Therefore, some  
356 of these desired long-term outcomes may not have been apparent due to the brief nature of the  
357 studies.

358



359 While numerous studies have underscored the manifold benefits of SHG participation, it is essential  
360 to recognise that they do not create an idealised, conflict-free environment where the challenges sex  
361 workers face in their daily lives cease to exist. One prominent issue highlighted in the literature  
362 pertains to the tensions that can arise between different groups of sex workers and between sex  
363 workers and non-sex workers who occasionally engage in these groups to access associated benefits  
364 [23, 31]. Trust emerges as another crucial factor that significantly influences the success of SHGs. In  
365 certain studies, trust issues were evident as some FSWs expressed reservations about trusting their  
366 peers, which, in turn, had repercussions for SHGs' overall effectiveness.

367

## 368 **Strengths and limitations**

369 This scoping review allowed us to broadly examine the different types of SHGs existing in SSA and  
370 assess how they influence SRH and HIV among FSWs. The focus on urban, rural, peri-urban and fishing  
371 communities allow for the data to be generalisable among broader population contexts. However, a  
372 few limitations can be noted. Firstly, we used only three search engines—Medline, Global Health and  
373 CINAHL—to conduct the article search despite knowing that other search engines may have yielded  
374 studies not included here. This was because conducting a scoping review involves substantial time and  
375 resources and inherent constraints led us to focus on the three well-curated and widely used  
376 databases. We carefully selected these three databases to minimise redundancy in our search results,  
377 considering the potential for overlapping content across multiple databases. They are comprehensive  
378 and they maximised the depth and relevance of the literature that was retrieved. This contributed  
379 positively to the overall quality of the review. Another limitation relates to the relatively few studies  
380 found, mostly published recently because SHGs are an emerging area of research in Africa, that needs  
381 to be expanded. Finally, we only included studies published in English which may have introduced  
382 language bias.

383

## 384 Conclusions

385 SHGs have shown great promise in empowering FSWs and addressing their health vulnerabilities. To  
386 fully harness the potential of SHGs, it is crucial to adopt a holistic, long-term, and community-centred  
387 approach, address trust and conflict issues, and advocate for broader structural changes that support  
388 FSWs' well-being and rights. By doing so, we can contribute to a more comprehensive and effective  
389 response to the complex health challenges faced by this vulnerable population.

390

## 391 Acknowledgments

392 We would like to acknowledge the support that was offered by the LSTM librarian who assisted in  
393 development of the search terms and manoeuvring the online library system.

|     | Authorship                 | Country      | Setting       | Study Design       | Sample size | Study period                         | Type(s) of SHG identified                                                                                           | Study aim/ objectives                                                                                                                                                                                                          | Main findings                                                                                                                                                                                                                                                                                                                                                                                                                                                                                    |
|-----|----------------------------|--------------|---------------|--------------------|-------------|--------------------------------------|---------------------------------------------------------------------------------------------------------------------|--------------------------------------------------------------------------------------------------------------------------------------------------------------------------------------------------------------------------------|--------------------------------------------------------------------------------------------------------------------------------------------------------------------------------------------------------------------------------------------------------------------------------------------------------------------------------------------------------------------------------------------------------------------------------------------------------------------------------------------------|
| 1   | Cange, C.W., et al., 2017  | Cameroon     | Peri-urban    | Qualitative        | 100         | Unspecified                          | Njangi – a form of microfinance, with FSWs meeting regularly in groups to support each other and to create cohesion | To qualitatively investigate the impact of social cohesion, as well as individual and community resilience strategies, on sex work empowerment in Cameroon.                                                                    | FSWs reported that they were faced with challenges of physical violence, sexual assault and demands for bribes to avoid fines and or imprisonment from authorities. They described strategies such as “looking out for each other” when faced with security threats.                                                                                                                                                                                                                             |
| 2   | Chingono, R., et al., 2022 | Zimbabwe     | Peri-urban    | Mixed methods      | 93          | 8 months (February - September 2019) | ISALS                                                                                                               | This study aimed to explore whether and how participation in a SHG intervention affected the experiences and perceptions of mental health stressors of vulnerable young mothers’ who sell sex.                                 | This study found that building support, reducing isolation and providing practical and material assistance helped meet many of adolescent girls and young women (AGYW)’s (who were also FSWs) needs related to their struggles to cope with looking after their children in a context of severe economic deprivation. The expansion of social networks seemed to benefit participants and this seemed to reduce stress and anxiety through meeting and discussing shared experiences with peers. |
| 3   | Huschke, S., 2019          | South Africa | Urban         | Qualitative        | 32          | December 2015 and July 2017          | Creative Space workshops (CSW)-risk reduction workshops                                                             | To investigate the social and psychological effects of peer-led risk-reduction workshops for sex workers in Soweto, South Africa, with a particular focus on the ways in which they might contribute to community empowerment. | CSW offered an environment for FSWs to come and vent out and share without fear of being judged. However, there was the feeling among interviewees that there were knowledge sharing limitations in a sex worker-only space. They suggested that medical and legal experts should be invited more regularly to the workshops. Sex workers also suggested that they should receive more training to be able to respond medical and legal questions.                                               |
| 4.1 | Kerrigan, D., et al., 2019 | Tanzania     | Fishing beach | Quantitative (RCT) | 496         | October 2015 to April 2016           | Informal networks and savings groups                                                                                | To determine the impact of a community empowerment model of combination HIV prevention (Project Shikamana) among female sex workers (FSW) in Iringa, Tanzania on HIV incidence.                                                | Project Shikamana suggested that a community empowerment-based approach to HIV prevention was both feasible and highly effective in sub-Saharan Africa. It highlighted a reduction of HIV incidence because of the intervention. This study suggested that community empowerment based models of HIV prevention be expanded.                                                                                                                                                                     |
| 4.2 | Leddy, A.M., et al., 2020  | Tanzania     | Rural         | Qualitative        | 36          | August 2016- August 2018             | Informal networks and savings groups                                                                                | This analysis aimed to describe the community empowerment process among female sex workers in Iringa,                                                                                                                          | Participants viewed the Drop-in-Centre as a place where they could openly be ‘working women’ (the term they used to refer to themselves), share their stories and                                                                                                                                                                                                                                                                                                                                |

|     |                             |                            |                 |                        |     |                             |                                                        |                                                                                                                                                                                                                                                                 |                                                                                                                                                                                                                                                                                                                                                                                                                                                                                                                                                                            |
|-----|-----------------------------|----------------------------|-----------------|------------------------|-----|-----------------------------|--------------------------------------------------------|-----------------------------------------------------------------------------------------------------------------------------------------------------------------------------------------------------------------------------------------------------------------|----------------------------------------------------------------------------------------------------------------------------------------------------------------------------------------------------------------------------------------------------------------------------------------------------------------------------------------------------------------------------------------------------------------------------------------------------------------------------------------------------------------------------------------------------------------------------|
|     |                             |                            |                 |                        |     |                             |                                                        | Tanzania, in the context of a randomised controlled trial of a community empowerment-based model of combination HIV prevention.                                                                                                                                 | concerns, and be treated with respect and dignity, which was not how they were typically treated in other spaces.                                                                                                                                                                                                                                                                                                                                                                                                                                                          |
| 4.3 | Mantsios, A., et al., 2018  | Tanzania                   | Farming area    | Quantitative           | 496 | Not specified               | Community savings groups                               | This analysis aimed to assess the association between participating in a community savings group and consistent condom use (CCU) among FSW in Iringa, Tanzania.                                                                                                 | Study findings indicated that community savings groups may play an important role in reducing sexual risk behaviours of FSWs and hold promise as part of comprehensive, community-led HIV prevention strategies among FSWs. Study found that individuals who were participating in savings groups had a higher chance of CCU with new clients in the last 30 days than those who were not part of a savings group.                                                                                                                                                         |
| 4.4 | Mantsios, A., et al., 2018  | Tanzania                   | Urban           | Qualitative            | 60  | April 2015 to February 2016 | Community savings group ( <i>michezo</i> )             | This paper describes the formative work for Project Shikamana. It aimed to examine the potential for community savings groups (locally called <i>michezo</i> ) among FSW in Iringa, Tanzania to reduce HIV risk and promote economic and community empowerment. | Women who participated in this pilot project of the Shikamana intervention felt that <i>michezo</i> provided them with financial and social support. They felt a sense of solidarity and collectivism from participating in <i>michezo</i> . Group participation influenced women's reported HIV risk. Some of the tensions and challenges experienced within the groups included a perceived sense of exclusion of certain women from participating. Women also expressed a desire to have the groups formally registered and become recognised by the broader community. |
| 5   | Nakamanya, S., et al., 2022 | Kenya, Tanzania and Uganda | Urban           | Qualitative            | 96  | March 2018 to June 2019     | Social network groupings (exchange of information)     | The study aimed to understand the different social networks among women working in fishing communities of Lake Victoria and also understand their interaction with women's mobility patterns and HIV risk.                                                      | Women's networks helped them find employment as well as social security whereby they saved, donated and lent money to one another through their associations known as ' <i>Ifogong'o</i> ' in Sukuma language (meaning savings pouch/purse [in Tanzania-TZ] and ' <i>Munno mukabi</i> ' in Luganda language (meaning 'a friend in need' self-help group [in Uganda-UG]).                                                                                                                                                                                                   |
| 6   | Namey, E., et al., 2018     | Cote d'Ivoire              | Urban           | Mixed methods approach | 78  | September - October 2014    | Savings groups                                         | The study aimed to better inform economic strengthening programs for HIV risk reduction with FSWs.                                                                                                                                                              | Group savings meetings were conducted regularly and members of the group were self-selected based on already existing relationships. This facilitated the introduction or reinforcement of health promotion and/or risk reduction messages.                                                                                                                                                                                                                                                                                                                                |
| 7   | Nathenson, P., et al., 2017 | Kenya                      | Urban and rural | Qualitative            | 29  | November 2012 for 6 months  | Women's cooperative, empowerment in business...fishing | The study aimed to describe a case study of an intervention in Kenya that empowered female fishmongers with business skills, boat ownership and                                                                                                                 | Participants were able to build three boats and women became profitable boat managers. Women were empowered through ownership and both men and                                                                                                                                                                                                                                                                                                                                                                                                                             |

|   |                           |       |       |             |    |              |                                                                                                                                     |                                                                                                                                             |                                                                                                                                                                                                                                                                                                                                                                                                                                                                                                                                         |
|---|---------------------------|-------|-------|-------------|----|--------------|-------------------------------------------------------------------------------------------------------------------------------------|---------------------------------------------------------------------------------------------------------------------------------------------|-----------------------------------------------------------------------------------------------------------------------------------------------------------------------------------------------------------------------------------------------------------------------------------------------------------------------------------------------------------------------------------------------------------------------------------------------------------------------------------------------------------------------------------------|
|   |                           |       |       |             |    |              |                                                                                                                                     | increased income so that they no longer had to trade sex for fish.                                                                          | women received skills training which empowered them as business people.                                                                                                                                                                                                                                                                                                                                                                                                                                                                 |
| 8 | Wanjiru, R., et al., 2022 | Kenya | Urban | Qualitative | 40 | October 2019 | Sex Workers Outreach Program (SWOP) clinics- support systems that developed because of the SWOP, friendships among clinic attendees | To explore how female sex workers in Nairobi, Kenya, utilise different resources to navigate the negative consequences of the work they do. | Sex workers reported that they benefited from a support system with other sex workers that developed while using the safe spaces within the SWOP Clinics. Over time, friendships grew amongst the clinic attendees, leading to strategies being devised to encourage and help each other. Encouraging FSWs to come together and advocate together for their needs was a key resource from which resilience and forbearance could grow. This would increase their negotiating power as a resilience asset, minimising exposure and risk. |

395

396

|                           | Section A: Are the results valid?                                                                                                                                                |                                               |                                                                                                                      |                                                                                                                                                                                                                                                                         |                                                                                                                                 |                                                                                                                                                                                                         | Section B: What are the results?                                                        |                                                                                                              |                                                  | Section C: Will the results help locally?                                                                                                                                                                                                                                                                                                                                                                    |
|---------------------------|----------------------------------------------------------------------------------------------------------------------------------------------------------------------------------|-----------------------------------------------|----------------------------------------------------------------------------------------------------------------------|-------------------------------------------------------------------------------------------------------------------------------------------------------------------------------------------------------------------------------------------------------------------------|---------------------------------------------------------------------------------------------------------------------------------|---------------------------------------------------------------------------------------------------------------------------------------------------------------------------------------------------------|-----------------------------------------------------------------------------------------|--------------------------------------------------------------------------------------------------------------|--------------------------------------------------|--------------------------------------------------------------------------------------------------------------------------------------------------------------------------------------------------------------------------------------------------------------------------------------------------------------------------------------------------------------------------------------------------------------|
| Publication               | Q1: Was there a clear statement of the aims?                                                                                                                                     | Q2: Is a qualitative methodology appropriate? | Q3: Was the research design appropriate to address the aims of the research?                                         | Q4: Was the recruitment strategy appropriate to the aims of the research?                                                                                                                                                                                               | Q5: Was the data collected in a way that addressed the research issue?                                                          | Q6: Has the relationship between researcher and participants been adequately considered?                                                                                                                | Q7: Have ethical issues been taken into consideration?                                  | Q8: Was the data analysis sufficiently rigorous?                                                             | Q9: Is there a clear statement of findings?      | Q10: How valuable is the research?                                                                                                                                                                                                                                                                                                                                                                           |
| Cange, C.W., et al., 2017 | Yes- the study sought to qualitatively investigate the impact of social cohesion, as well as individual and community resilience strategies, on sex work empowerment in Cameroon | Yes                                           | Yes: a qualitative research design was appropriate to respond to the aims of exploring the impact of social cohesion | A qualitative research design was appropriate to respond to the aims of exploring the impact of social cohesion.<br><br>In as much as the recruitment strategy was mentioned initially, it is not clear how the 37 participants eventually made it to the final sample. | Yes: the use of in-depth interviews and focus groups was in my view adequate to obtain data that spoke to the research question | Yes... interviews were conducted in a language well understood by participants and researchers were trained to speak to sex workers.<br><br>However, there is no statement of researcher positionality. | The study obtained requisite IRB clearance as well as written consent from participants | Yes- poor and inconsistent quality transcripts were eliminated and there was inter-researcher triangulation. | Yes- 4 key themes were derived from the findings | The research is valuable in showing how valuable social cohesion is especially when they come together in groups to address common challenges; e.g. going to the clinic together, loaning each other money in groups. However, this study did not go into much detail about the organisation of these groups that the FSWs were in and it lacks enough evidence on effectiveness of SHGs in empowering FSWs. |

|                                            |                                                                                                                                             |                                                                          |                                                                           |     |                                   |                                                                                                                                                                                                                                                                                                                                                                             |                                                                                                                   |                                                                                                                                                        |                                                     |                                                                                                                                                                                                                 |
|--------------------------------------------|---------------------------------------------------------------------------------------------------------------------------------------------|--------------------------------------------------------------------------|---------------------------------------------------------------------------|-----|-----------------------------------|-----------------------------------------------------------------------------------------------------------------------------------------------------------------------------------------------------------------------------------------------------------------------------------------------------------------------------------------------------------------------------|-------------------------------------------------------------------------------------------------------------------|--------------------------------------------------------------------------------------------------------------------------------------------------------|-----------------------------------------------------|-----------------------------------------------------------------------------------------------------------------------------------------------------------------------------------------------------------------|
| Chingono, R., et al., 2022 (mixed methods) | Yes- to examine participants' mental health stressors and how these may have been influenced through participation in the SHG intervention. | Yes- Using FGDs and semi structured interviews as well as questionnaires | Yes, the research design was adequate to address the aims of the research | Yes | Yes, data was adequately selected | Not really: The lead author does mention her positionality as a female social scientist, but the paper does not address the researcher-participants relationship in clearer detail. However, in terms of the data collection in the methods section, there is an indication that the relationship between the researcher and the participants was taken into consideration. | Yes, ethical clearance was obtained from regulatory authorities. Also, written informed consent from participants | Yes, the data analysis was rigorous enough as the authors explained how they formulated the content analysis and subsequent inductive coding framework | Yes, four key themes were derived from the findings | The research is valuable as it shows the effectiveness of SHGs in impacting mental health among young FSWs. It also highlights why some SHG members drop out and this feeds into the question on sustainability |
|--------------------------------------------|---------------------------------------------------------------------------------------------------------------------------------------------|--------------------------------------------------------------------------|---------------------------------------------------------------------------|-----|-----------------------------------|-----------------------------------------------------------------------------------------------------------------------------------------------------------------------------------------------------------------------------------------------------------------------------------------------------------------------------------------------------------------------------|-------------------------------------------------------------------------------------------------------------------|--------------------------------------------------------------------------------------------------------------------------------------------------------|-----------------------------------------------------|-----------------------------------------------------------------------------------------------------------------------------------------------------------------------------------------------------------------|

|                   |                                                                                                                                                                                                                                                     |                                                                                                                                  |                                                                        |                                                                                                                                                                                              |                                                               |                                                                                                                                                                                                                                                                                                                              |                                                                                        |                                                                                                                                                                                                                                                                               |                                                       |                                                                                                                                                                                                                            |
|-------------------|-----------------------------------------------------------------------------------------------------------------------------------------------------------------------------------------------------------------------------------------------------|----------------------------------------------------------------------------------------------------------------------------------|------------------------------------------------------------------------|----------------------------------------------------------------------------------------------------------------------------------------------------------------------------------------------|---------------------------------------------------------------|------------------------------------------------------------------------------------------------------------------------------------------------------------------------------------------------------------------------------------------------------------------------------------------------------------------------------|----------------------------------------------------------------------------------------|-------------------------------------------------------------------------------------------------------------------------------------------------------------------------------------------------------------------------------------------------------------------------------|-------------------------------------------------------|----------------------------------------------------------------------------------------------------------------------------------------------------------------------------------------------------------------------------|
| Huschke, S., 2019 | Yes- The aim of this paper is to investigate the social and psychological effects of Creative Space workshops for sex workers in Soweto, South Africa, with a particular focus on the ways in which they might contribute to community empowerment. | Yes, a qualitative design was appropriate since the study sought to explore the efficacy of peer-led workshops in empowering FSW | Yes: The research design was relevant to address the aims of the study | The paper doesn't specify how the participants were recruited. It however mentions that the data that was analysed was a subset of data that was collected earlier in an ethnographic study. | Yes. Data collection spoke sufficiently to the research issue | The relationship between the researcher and the participants has not been adequately considered. However, there is mention that interviews were conducted in Isizulu, but it is not explicitly mentioned that this was the language of the participants. I am drawn to assume that this was the language of the participants | Yes- the study received ethical approval. However, consent was oral and not documented | Data analysis was rigorous, but the main shortcoming was that it was done by one person. It is not mentioned in the paper whether the author was working with other researchers to triangulate themes coming from the analysis of the data and there is risk of subjectivity. | Yes- findings are very clear and supported by quotes. | The research is very valuable as it espouses how female sex workers coming together in groups can facilitate the process of empowerment as they support each other to navigate through common challenges through the CSWs. |
|-------------------|-----------------------------------------------------------------------------------------------------------------------------------------------------------------------------------------------------------------------------------------------------|----------------------------------------------------------------------------------------------------------------------------------|------------------------------------------------------------------------|----------------------------------------------------------------------------------------------------------------------------------------------------------------------------------------------|---------------------------------------------------------------|------------------------------------------------------------------------------------------------------------------------------------------------------------------------------------------------------------------------------------------------------------------------------------------------------------------------------|----------------------------------------------------------------------------------------|-------------------------------------------------------------------------------------------------------------------------------------------------------------------------------------------------------------------------------------------------------------------------------|-------------------------------------------------------|----------------------------------------------------------------------------------------------------------------------------------------------------------------------------------------------------------------------------|



|                            |                                                                                                                                                                                                                                 |                                                                                           |                                                                             |                                                                                                |                                                                                                        |                                                                                                                                      |                                                                                                                                                               |                                                                                                                  |                                                                     |                                                                                                                                                                                              |
|----------------------------|---------------------------------------------------------------------------------------------------------------------------------------------------------------------------------------------------------------------------------|-------------------------------------------------------------------------------------------|-----------------------------------------------------------------------------|------------------------------------------------------------------------------------------------|--------------------------------------------------------------------------------------------------------|--------------------------------------------------------------------------------------------------------------------------------------|---------------------------------------------------------------------------------------------------------------------------------------------------------------|------------------------------------------------------------------------------------------------------------------|---------------------------------------------------------------------|----------------------------------------------------------------------------------------------------------------------------------------------------------------------------------------------|
| Leddy, A.M., et al., 2020  | Yes, it aimed to describe the community empowerment process among female sex workers in Iringa, Tanzania, in the context of a randomised controlled trial of a community empowerment-based model of combination HIV prevention. | Yes- A qualitative approach was ideal to respond to the aims of the study                 | Yes- The research design was necessary to address the study aims            | Yes- Recruitment was correct as it drew participants from those initially selected for the RCT | Yes- Use of in-depth interviews and key informant interviews to gather qualitative data                | Is not stated, however, its indicated that the interviews were conducted in the language of the participants                         | Yes, there was ethical approval from IRB                                                                                                                      | Yes- The study adopted a deductive-inductive thematic analysis approach                                          | Yes- Yes, the findings are clearly stated and logically presented   | The results will help in giving insights on how SHGs can be better sustained and develop to be more structured.                                                                              |
| Mantsios, A., et al., 2018 | Yes, examines the potential for community savings groups (locally called <i>michezo</i> ) among FSW in Iringa, Tanzania to reduce HIV risk and promote economic and community empowerment.                                      | Yes, a qualitative methodology was followed and adequately spoke to the aims of the study | Yes, the research design was qualitative and spoke to the aims of the study | Yes- Recruitment was correct as snowball sampling was used to gather the sample.               | Yes- Qualitative data collection tools were used while nonprobability sampling methods were also used. | Yes- interviewer was trained and had established rapport with the participants. Interviews were also conducted in the local language | Yes- Participants provided oral consent and their identities were anonymised. Relevant institutional permissions to conduct the study were sought and granted | Yes- Data were analysed manually as well as through qualitative data management and analysis software (ATLAS Ti) | Yes- Findings were thematically presented and supported with quotes | The results are very useful in understanding savings groups among FSWs. It clearly defined how the group was organised and how it operated and this speaks to sustainability of such groups. |

|                                            |                                                                                                                                                                                                                                              |                                                        |                                                                                       |                                                                                                                                                                             |                                                                                                      |                                                                                                                                                                              |                                                                                                                       |                                                                        |                                                                                                               |                                                                                                                                                                                                                                                                                          |
|--------------------------------------------|----------------------------------------------------------------------------------------------------------------------------------------------------------------------------------------------------------------------------------------------|--------------------------------------------------------|---------------------------------------------------------------------------------------|-----------------------------------------------------------------------------------------------------------------------------------------------------------------------------|------------------------------------------------------------------------------------------------------|------------------------------------------------------------------------------------------------------------------------------------------------------------------------------|-----------------------------------------------------------------------------------------------------------------------|------------------------------------------------------------------------|---------------------------------------------------------------------------------------------------------------|------------------------------------------------------------------------------------------------------------------------------------------------------------------------------------------------------------------------------------------------------------------------------------------|
| Nakamanya, S., et al., 2022                | Yes- to describe different social networks, mobility patterns and risk of HIV acquisition among women resident and/or working in fishing communities in the three East African countries bordering Lake Victoria: Kenya, Tanzania and Uganda | Yes- A qualitative approach is warranted in this study | Yes- the multi-site qualitative nature of the study is explicitly stated in the paper | Yes- recruitment was guided by the gatekeepers across the 4 sites. However there is likely to have been bias as they may have subjectively influenced choice of respondents | Yes- Yes, data were collected qualitatively through participant observation, and in depth interviews | Yes- interviews conducted in the languages of participants and conducted by trained interviewers                                                                             | Yes- Community entry and Informed consent were sought from community elders/gatekeepers and participants respectively | Yes-thematic framework approach was used and the process was iterative | No- There is no clear statement of findings, however, different findings are presented in the results section | The results will help in showing the downside of groups which come together and actually live together and move together in cases of migration. The findings also help look at FSWs in the context of other population groups that they work alongside; e.g. fishermen, bar workers etc. |
| Namey, E., et al., 2018<br>(mixed methods) | Yes-to help describe potential distal financial determinants of HIV risk and to inform the development of a pilot economic strengthening program.                                                                                            | Yes- A mixed methods approach informed this paper      | Yes- Yes, the approach was relatively appropriate                                     | Yes- Yes, the recruitment spoke to the aims of the study                                                                                                                    | Yes- Mixed data were collected with qualitative data and quantitative financial data being collected | Case workers from local organisations who identified the participants for the study were the ones who introduced participants to interviewers. However, no other information | No- Participants granted verbal/oral informed consent                                                                 | Yes, data was analysed using thematic analysis                         | Yes- Data were presented following specified thematic codes                                                   | This study did not give more insights about SHGs. The focus was more on how FSWs manage their finances rather than on SHGs. It lack enough evidence on SHGs and how they influence FSWs.                                                                                                 |

|                             |                                                                                                                                                                                                                  |     |                                                                                                                |                             |         |                                                                                                                                                                                                                    |         |         |                                |                                                                                                                                  |
|-----------------------------|------------------------------------------------------------------------------------------------------------------------------------------------------------------------------------------------------------------|-----|----------------------------------------------------------------------------------------------------------------|-----------------------------|---------|--------------------------------------------------------------------------------------------------------------------------------------------------------------------------------------------------------------------|---------|---------|--------------------------------|----------------------------------------------------------------------------------------------------------------------------------|
|                             |                                                                                                                                                                                                                  |     |                                                                                                                |                             |         | shows the relationship between the participants and the interviewers<br><br>Selection of study participants may have been influenced by the recruitment methods of using case workers... there may be subjectivity |         |         |                                |                                                                                                                                  |
| Nathenson, P., et al., 2017 | Yes- This paper describes a case study of an intervention in Kenya that empowered female fishmongers with business skills, boat ownership and increased income so that they no longer had to trade sex for fish. | Yes | Not clear- the methodology section is unclear, but as a case study, it managed to address the aim of the study | Methodology section unclear | Unclear | Unclear                                                                                                                                                                                                            | Unclear | Unclear | Clear outcomes were documented | Results will be useful locally as it clearly shows the impact of self-help groups through empowerment initiatives (savings fund) |

|                           |                                                                                                                                                                                                                                     |                                                                        |                                                                                 |                                         |                                       |                                                                                                                                  |     |                              |     |                                                                                                                                |
|---------------------------|-------------------------------------------------------------------------------------------------------------------------------------------------------------------------------------------------------------------------------------|------------------------------------------------------------------------|---------------------------------------------------------------------------------|-----------------------------------------|---------------------------------------|----------------------------------------------------------------------------------------------------------------------------------|-----|------------------------------|-----|--------------------------------------------------------------------------------------------------------------------------------|
| Wanjiru, R., et al., 2022 | Yes- to explore how different experiences over the life-course of FSWs interact to keep them disenfranchised or marginalized, especially in Kenya and explore how they cope, survive, and even thrive, despite these circumstances. | Yes- it is appropriate as the paper seeks to explore resilience issues | Yes-it was appropriate as it used the in-depth interview method to collect data | Yes- Participants were randomly sampled | Yes- Data were collected through IDIs | Yes- the social scientist who were trained extensively on the protocol and they interviewed ion the language of the participants | Yes | Yes, three themes identified | Yes | Yes-information on how they built resilience through their support systems informs how SHGs can facilitate empowerment of FSWs |
|---------------------------|-------------------------------------------------------------------------------------------------------------------------------------------------------------------------------------------------------------------------------------|------------------------------------------------------------------------|---------------------------------------------------------------------------------|-----------------------------------------|---------------------------------------|----------------------------------------------------------------------------------------------------------------------------------|-----|------------------------------|-----|--------------------------------------------------------------------------------------------------------------------------------|

## 399 References

- 400 1. UNAIDS, *Global AIDS Update: In Danger*. AIDSinfo, 2022.
- 401 2. Navarrete Gil, C., et al., *Best Practices and Challenges to Sex Worker Community*  
402 *Empowerment and Mobilisation Strategies to Promote Health and Human Rights*, in *Sex Work,*  
403 *Health, and Human Rights: Global Inequities, Challenges, and Opportunities for Action*, S.M.  
404 Goldenberg, et al., Editors. 2021, Springer International Publishing: Cham. p. 189-206.
- 405 3. Panchanadeswaran, S., et al., *Female Sex Workers' Experiences of Violence and Aggression*  
406 *from Sexual Partners*, in *Handbook of Anger, Aggression, and Violence*, C. Martin, V.R. Preedy,  
407 and V.B. Patel, Editors. 2022, Springer International Publishing: Cham. p. 1-19.
- 408 4. Moore, L., et al., *Community empowerment and involvement of female sex workers in targeted*  
409 *sexual and reproductive health interventions in Africa: a systematic review*. *Global Health*,  
410 2014. **10**: p. 47.
- 411 5. Cornell, M., et al., *HIV services in sub-Saharan Africa: the greatest gap is men*. *Lancet*, 2021.  
412 **397**(10290): p. 2130-2132.
- 413 6. WHO, *Preventing HIV in sex work settings in sub-Saharan Africa*. 2011: WHO Press, World  
414 Health Organization.
- 415 7. Ali, M.S., et al., *Estimation of HIV incidence from analysis of HIV prevalence patterns among*  
416 *female sex workers in Zimbabwe*. *AIDS (London, England)*, 2022. **36**(8): p. 1141-1150.
- 417 8. Chen, L., et al., *Sexual Risk Factors for HIV Infection in Early and Advanced HIV Epidemics in*  
418 *Sub-Saharan Africa: Systematic Overview of 68 Epidemiological Studies*. *PloS one*, 2007. **2**: p.  
419 e1001.
- 420 9. Gurnani, V., et al., *An integrated structural intervention to reduce vulnerability to HIV and*  
421 *sexually transmitted infections among female sex workers in Karnataka state, south India*.  
422 *BMC Public Health*, 2011. **11**(1): p. 755.
- 423 10. Borkman, T., *A selective look at self-help groups in the United States*. *Health & Social Care in*  
424 *the Community*, 2007. **5**: p. 357-364.
- 425 11. Tomofumi Oka, T.B., *The History, Concepts and Theories of Self-Help Groups: From an*  
426 *International Perspective*. *The Japanese Journal of Occupational Therapy* 34(7), 718-722, (July,  
427 2000), 2020. **34**(7): p. 718-722.
- 428 12. Brody, C., et al., *Economic Self-Help group Programs for Improving Women's Empowerment:*  
429 *A Systematic Review*. *Campbell Systematic Reviews*, 2015. **11**(1): p. 1-182.
- 430 13. Blanchard, A.K., et al., *Community mobilization, empowerment and HIV prevention among*  
431 *female sex workers in south India*. *BMC Public Health*, 2013. **13**(1): p. 234.
- 432 14. Brody, C., et al., *Can self-help group programs improve women's empowerment? A systematic*  
433 *review*. *Journal of Development Effectiveness*, 2016. **9**: p. 1-26.
- 434 15. Yadav, A., et al., *Female Sex Workers and Their Association with Self-Help Groups in Thane,*  
435 *Maharashtra, India: A Comparative Analysis in the Context of HIV Program Outcome*. *World*  
436 *Journal of AIDS*, 2016. **Vol.06No.04**: p. 11.
- 437 16. Madimutsa, G., et al., *Do self-help groups improve sexual and reproductive health and HIV*  
438 *outcomes among female sex workers in sub-Saharan Africa? A scoping review protocol*  
439 *[version 1; peer review: awaiting peer review]*. *Wellcome Open Research*, 2024. **9**(535).
- 440 17. Pollock, D., et al., *Recommendations for the extraction, analysis, and presentation of results in*  
441 *scoping reviews*. *JBI evidence synthesis*, 2023. **21**(3): p. 520-532.
- 442 18. Gugerty, M.K., P. Biscaye, and C.L. Anderson, *Delivering development? Evidence on self-help*  
443 *groups as development intermediaries in South Asia and Africa*. *Dev Policy Rev*, 2019. **37**(1):  
444 p. 129-151.
- 445 19. Arksey, H. and L. O'Malley, *Scoping studies: towards a methodological framework*.  
446 *International Journal of Social Research Methodology*, 2005. **8**(1): p. 19-32.

- 447 20. Levac, D., H. Colquhoun, and K.K. O'Brien, *Scoping studies: advancing the methodology*.  
448 Implementation Science, 2010. **5**(1): p. 69.
- 449 21. Colquhoun, H.L., et al., *Scoping reviews: time for clarity in definition, methods, and reporting*.  
450 J Clin Epidemiol, 2014. **67**(12): p. 1291-4.
- 451 22. Peters, M.D.J., et al., *Updated methodological guidance for the conduct of scoping reviews*. JBI  
452 Evid Synth, 2020. **18**(10): p. 2119-2126.
- 453 23. Nakamanya, S., et al., *Social networks, mobility, and HIV risk among women in the fishing  
454 communities of Lake Victoria*. BMC Womens Health, 2022. **22**(1): p. 555.
- 455 24. Kerrigan, D., et al., *Project Shikamana: Community Empowerment-Based Combination HIV  
456 Prevention Significantly Impacts HIV Incidence and Care Continuum Outcomes Among Female  
457 Sex Workers in Iringa, Tanzania*. J Acquir Immune Defic Syndr, 2019. **82**(2): p. 141-148.
- 458 25. Leddy, A.M., et al., *Essential elements of a community empowerment approach to HIV  
459 prevention among female sex workers engaged in project Shikamana in Iringa, Tanzania*. Cult  
460 Health Sex, 2020. **22**(sup1): p. 111-126.
- 461 26. Mantsios, A., et al., *Community Savings Groups, Financial Security, and HIV Risk Among Female  
462 Sex Workers in Iringa, Tanzania*. AIDS Behav, 2018. **22**(11): p. 3742-3750.
- 463 27. Mantsios, A., et al., *'That's how we help each other': Community savings groups, economic  
464 empowerment and HIV risk among female sex workers in Iringa, Tanzania*. PLoS One, 2018.  
465 **13**(7): p. e0199583.
- 466 28. Chingono, R., et al., *'I was in need of somewhere to release my hurt:' Addressing the mental  
467 health of vulnerable adolescent mothers in Harare, Zimbabwe, through self-help groups*. Glob  
468 Health Action, 2022. **15**(1): p. 2040151.
- 469 29. Cange, C.W., et al., *Female sex workers' empowerment strategies amid HIV-related  
470 socioeconomic vulnerabilities in Cameroon*. Cult Health Sex, 2017. **19**(10): p. 1053-1065.
- 471 30. Namey, E., et al., *Understanding the financial lives of female sex workers in Abidjan,  
472 Cote d'Ivoire: implications for economic strengthening interventions for HIV  
473 prevention*. AIDS Care, 2018. **30**(Suppl. 3): p. 6-17.
- 474 31. Huschke, S., *Empowering sex workers? Critical reflections on peer-led risk-reduction  
475 workshops in Soweto, South Africa*. Glob Health Action, 2019. **12**(1): p. 1522149.
- 476 32. Wanjiru, R., et al., *Beaten but not down! Exploring resilience among female sex workers (FSWs)  
477 in Nairobi, Kenya*. BMC Public Health, 2022. **22**(1): p. 965.
- 478 33. Nathenson, P., et al., *No sex for fish: empowering women to promote health and economic  
479 opportunity in a localized place in Kenya*. Health Promot Int, 2017. **32**(5): p. 800-807.
- 480 34. Leddy, A.M., et al., *Essential elements of a community empowerment approach to HIV  
481 prevention among female sex workers engaged in project Shikamana in Iringa, Tanzania*.  
482 Culture, health & sexuality, 2020. **22**(sup1): p. 111-126.
- 483 35. UK, C. *CASP Systematic Review Checklist* CASP Systematic Review Checklist 2020 [cited 2024  
484 20 JUNE 2024]; Available from: [https://casp-uk.net/wp-content/uploads/2018/01/CASP-Systematic-Review-Checklist\\_2018.pdf%5B1](https://casp-uk.net/wp-content/uploads/2018/01/CASP-Systematic-Review-Checklist_2018.pdf%5B1).
- 485
- 486 36. Sterne JAC, S.J., Page MJ, Elbers RG, Blencowe NS, Boutron I, Cates CJ, Cheng HY, Corbett MS,  
487 Eldridge SM, Emberson JR, Hernán MA, Hopewell S, Hróbjartsson A, Junqueira DR, Jüni P,  
488 Kirkham JJ, Lasserson T, Li T, McAleenan A, Reeves BC, Shepperd S, Shrier I, Stewart LA, Tilling  
489 K, White IR, Whiting PF, Higgins JPT, *RoB 2: a revised tool for assessing risk of bias in  
490 randomised trials*, in *BMJ*. 2019.
- 491 37. Sterne JAC, H.M., Reeves BC, Savović J, Berkman ND, Viswanathan M, Henry D, Altman DG,  
492 Ansari MT, Boutron I, Carpenter JR, Chan AW, Churchill R, Deeks JJ, Hróbjartsson A, Kirkham  
493 J, Jüni P, Loke YK, Pigott TD, Ramsay CR, Regidor D, Rothstein HR, Sandhu L, Santaguida PL,  
494 Schünemann HJ, Shea B, Shrier I, Tugwell P, Turner L, Valentine JC, Waddington H, Waters E,  
495 Wells GA, Whiting PF, Higgins JPT., *ROBINS-I: a tool for assessing risk of bias in non-randomised  
496 studies of interventions*. 2016, *BMJ*.

- 497 38. Blankenship, K.M., et al., *Power, community mobilization, and condom use practices among*  
498 *female sex workers in Andhra Pradesh, India*. AIDS, 2008. **22**: p. S109-S116.
- 499 39. Pillai, P., et al., *Impact of two vulnerability reduction strategies—collectivisation and*  
500 *participation in savings activities—on HIV risk reduction among female sex workers*.  
501 Bangalore, India: Karnataka Health Promotion Trust (KHPT), 2012.
- 502 40. VeneKlasen, L.M., *Valerie Power and empowerment*. International Institute for Environment  
503 and Development, 2002. **43**: p. 39-41.
- 504 41. Cange, C.W., et al., *Female sex workers' empowerment strategies amid HIV-related*  
505 *socioeconomic vulnerabilities in Cameroon*. Culture, health & sexuality, 2017. **19**(10): p. 1053-  
506 1065.
- 507 42. Cange, C.W., et al., *Female sex workers' empowerment strategies amid HIV-related*  
508 *socioeconomic vulnerabilities in Cameroon*. CULTURE HEALTH & SEXUALITY, 2017. **19**(10): p.  
509 1053-1065.
- 510 43. Bell, C. *Economic Power-sharing, Conflict Resolution and Development in Peace Negotiations*  
511 *and Agreements*. 2018.
- 512 44. Namey, E., et al., *The financial lives of female sex workers in Addis Ababa, Ethiopia:*  
513 *implications for economic strengthening interventions for HIV prevention*. AIDS Care, 2022.  
514 **34**(3): p. 379-387.
- 515 45. NSWP, *Global network for sex work projects- Promoting health and human rights*. 2020.
- 516

517 Supporting information

518

519 S1\_Table: Mesh and free text search strategy

520



Identification

Studies from databases/registers (n = 1567)

medRxiv preprint doi: <https://doi.org/10.1101/2024.10.10.24315253>; this version posted October 11, 2024. The copyright holder for this preprint (which was not certified by peer review) is the author/funder, who has granted medRxiv a license to display the preprint in perpetuity. It is made available under a [CC-BY 4.0 International license](https://creativecommons.org/licenses/by/4.0/).

Duplicate References removed (n = 92)

Screening

Studies screened (n = 1474)

Studies excluded (n = 1439)

Studies sought for retrieval (n = 35)

Studies assessed for eligibility (n = 35)

Studies excluded (n = 24)  
Not from SSA (n = 2)  
Not SHG related (n = 17)  
Not primary research (n = 1)  
Wrong population- not FSWs (n = 3)  
Wrong year of publication (n=1)

Included

Studies included in review (n = 11)

Figure 1: PRISMA flowchart of study selection process

Figure

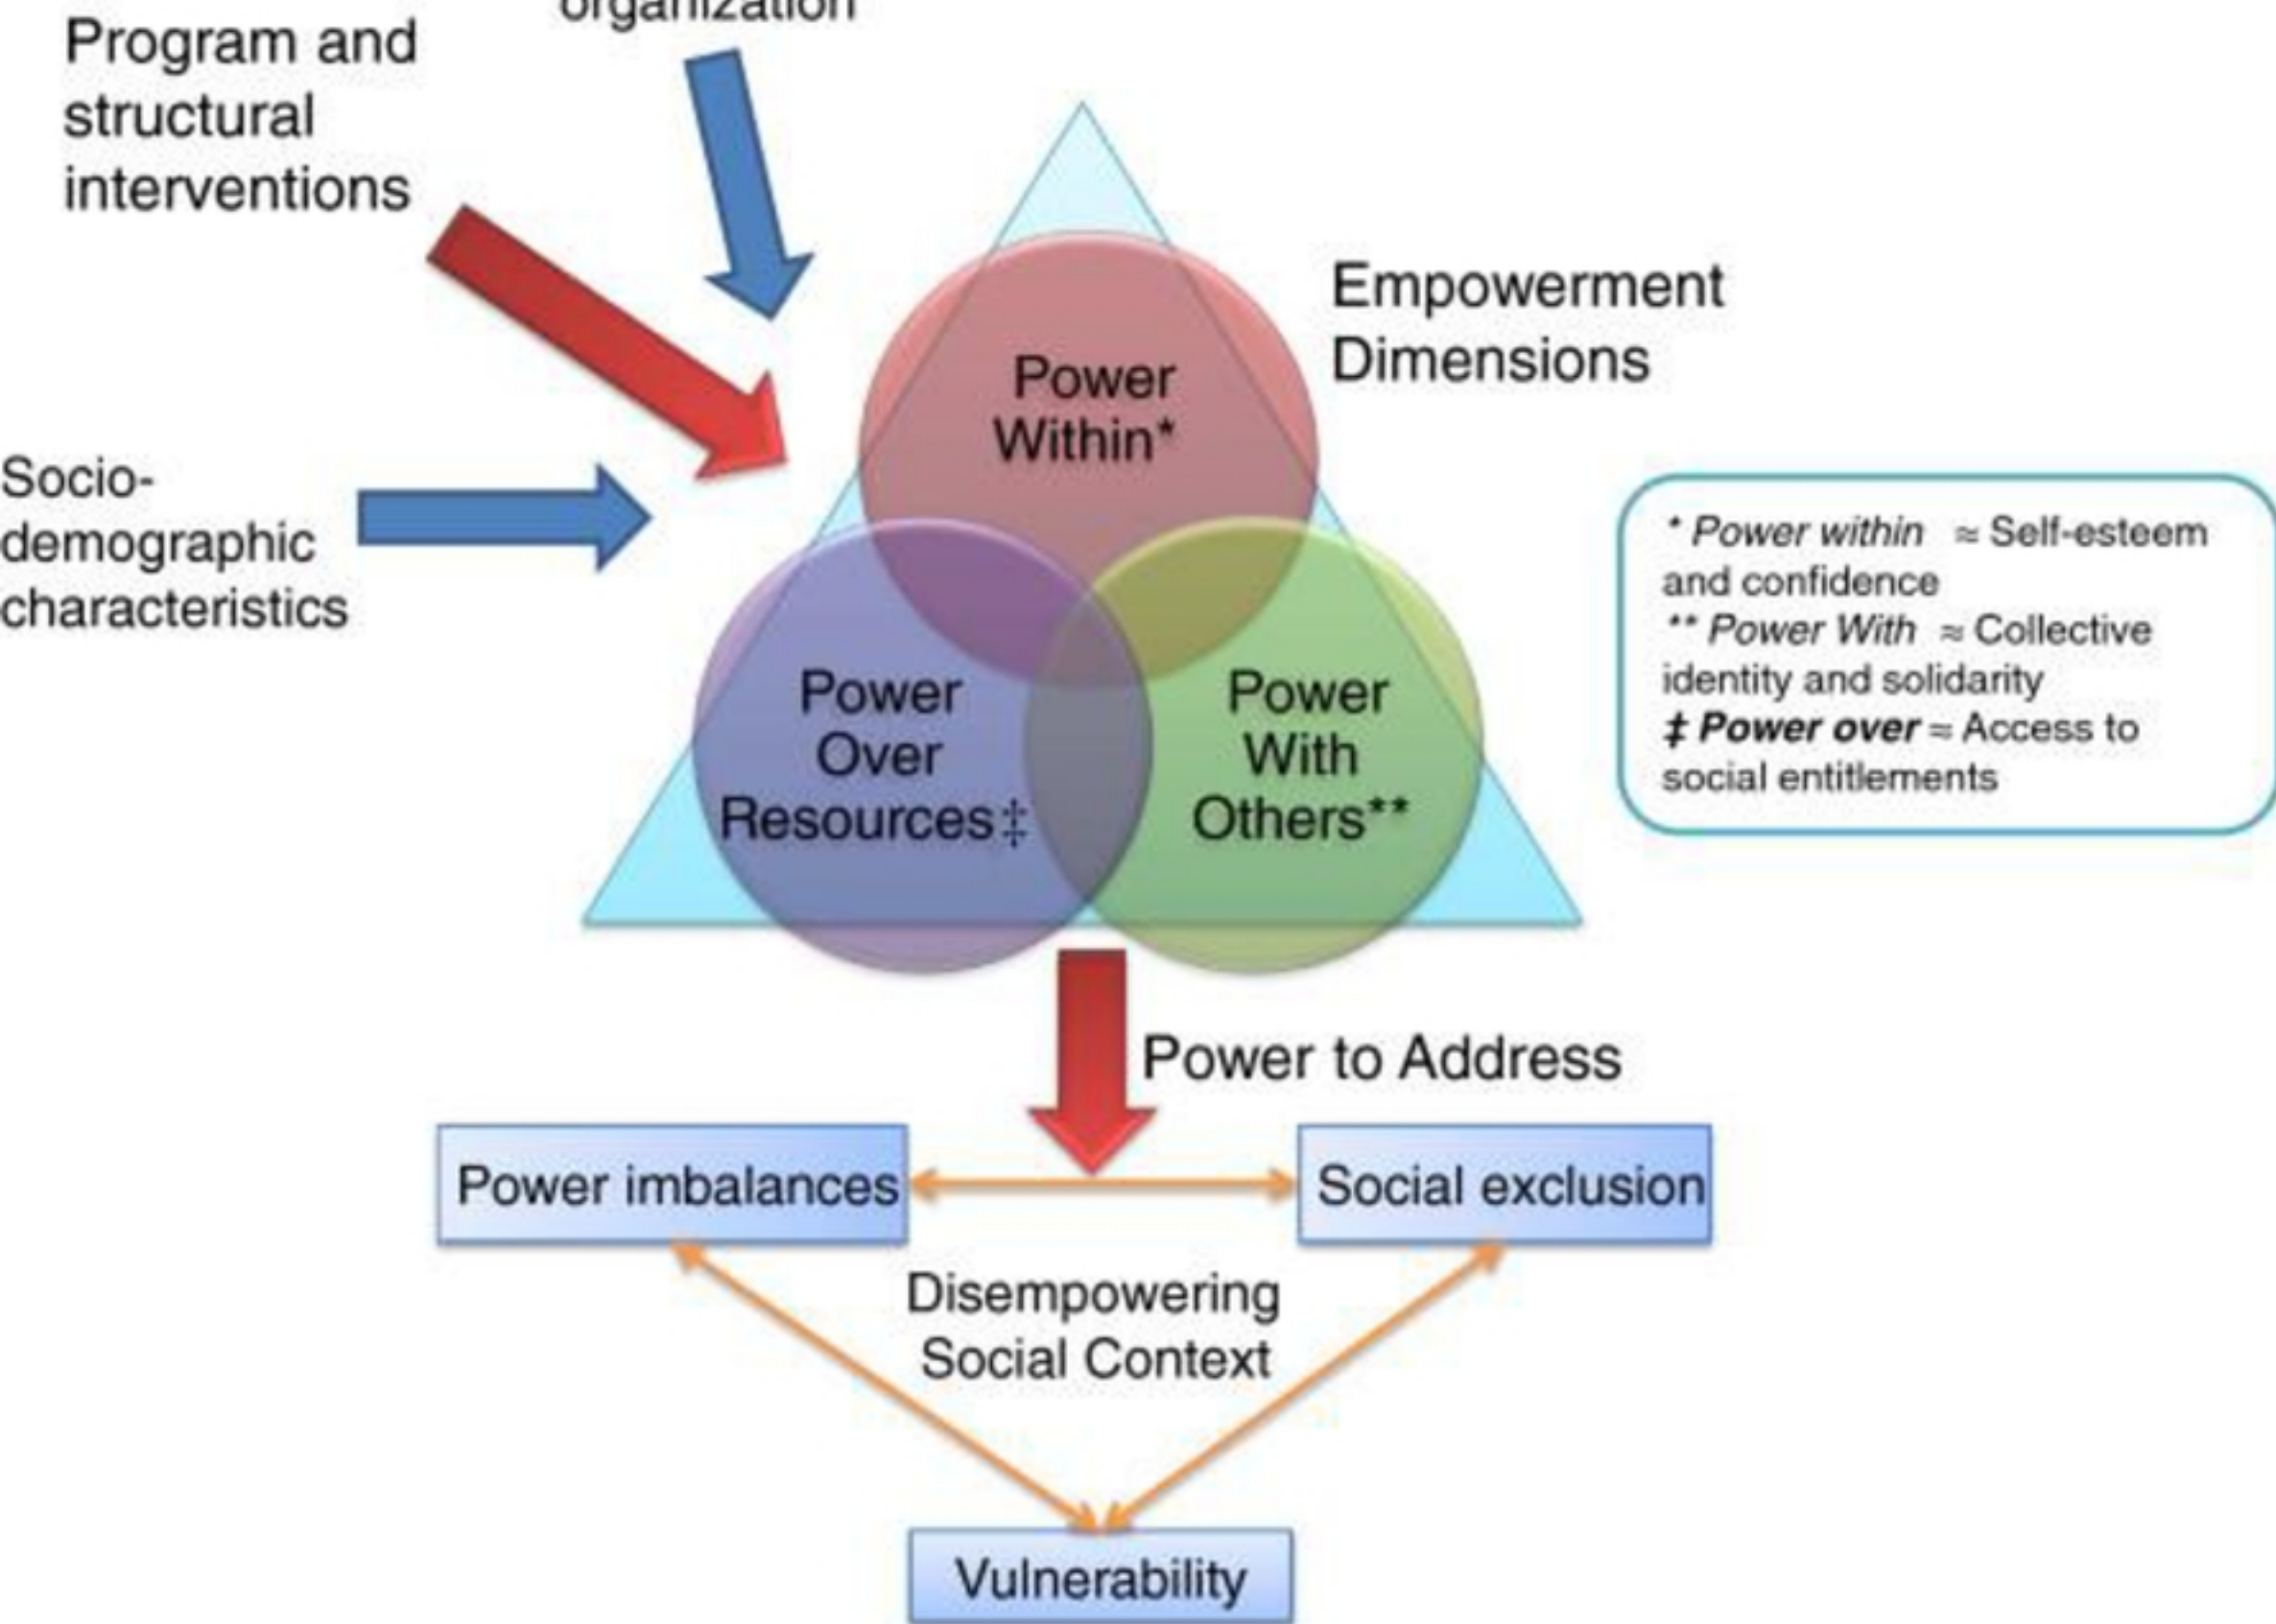

Figure 1 Integrated empowerment framework

Source: Blanchard et al. BMC Public Health 2013, 13:234

Figure
